## Caloric restriction induces heat shock response and inhibits B16F10 cell tumorigenesis both *in vitro* and *in vivo*

Marta G. Novelle<sup>1,3</sup>, Ashley Davis<sup>1</sup>, Nathan L. Price<sup>1</sup>, Ahmed Ali<sup>1</sup>, Stefanie Fürer-Galvan<sup>1</sup>, Yongqing Zhang<sup>2</sup>, Kevin Becker<sup>2</sup>, Michel Bernier<sup>1</sup>, and Rafael de Cabo<sup>1</sup>

<sup>1</sup>Translational Gerontology Branch, National Institute on Aging, National Institutes of Health, Baltimore, MD 21224, USA;

<sup>2</sup>Gene Expression and Genomics Unit, National Institute on Aging, National Institutes of Health, Baltimore, MD 21224, USA;

<sup>3</sup>Department of Physiology, CIMUS, University of Santiago de Compostela-Instituto de Investigación Sanitaria, 15782 Santiago de Compostela, Spain; CIBER Fisiopatología de la Obesidad y Nutrición (CIBERObn), 15706 Santiago de Compostela, Spain.

**Key words:** caloric restriction, heat shock, stress response, tumorigenesis, aging

**Received:** 12/01/14; **Accepted:** 03/24/15; **Published:** 04/05/15

**Correspondence to:** Rafael de Cabo, PhD; **E-mail:** decabora@grc.nia.nih.gov

**Copyright:** Novelle et al. This is an open-access article distributed under the terms of the Creative Commons Attribution License, which permits unrestricted use, distribution, and reproduction in any medium, provided the original author and source are credited

**Abstract:** Caloric restriction (CR) without malnutrition is one of the most consistent strategies for increasing mean and maximal lifespan and delaying the onset of age-associated diseases. Stress resistance is a common trait of many long-lived mutants and life-extending interventions, including CR. Indeed, better protection against heat shock and other genotoxic insults have helped explain the pro-survival properties of CR. In this study, both *in vitro* and *in vivo* responses to heat shock were investigated using two different models of CR. Murine B16F10 melanoma cells treated with serum from CR-fed rats showed lower proliferation, increased tolerance to heat shock and enhanced HSP-70 expression, compared to serum from *ad libitum*-fed animals. Similar effects were observed in B16F10 cells implanted subcutaneously in male C57BL/6 mice subjected to CR. Microarray analysis identified a number of genes and pathways whose expression profile were similar in both models. These results suggest that the use of an *in vitro* model could be a good alternative to study the mechanisms by which CR exerts its anti-tumorigenic effects.

### INTRODUCTION

Aging is a complex multifactorial process, whereby organisms undergo major cell degeneration and loss of function. During aging, irreversible and deleterious processes are triggered by accumulation of damaged cellular macromolecules [1, 2]. Several theories have been proposed to explain these processes [3, 4], but the exact molecular mechanisms behind aging remains unknown. Cellular damage may result from oxidative stress, toxic metabolic byproducts, endoplasmic reticulum stress and mitochondrial unfolded protein responses, or exposure to heat stress, among others. Several heat shock proteins (HSP) function as molecular

chaperones by preventing misfolding and aggregation of other proteins. This induction of cytoprotective responses promotes longevity [5, 6]; conversely, aging is associated with down-regulation in HSP expression in neuronal tissue, skeletal and cardiac muscle, and the liver [7, 8]. Stimulation of HSP synthesis has been suggested as a viable strategy to counteract the negative effects of aging and eliciting a ‘low-grade’ stress response may help organisms live longer and improve their survival [9].

More than 8 decades ago, McCay and colleagues observed that severe reduction in calorie intake while maintaining sufficient micronutrient levels for optimum health resulted in lifespan extension [10]. Since then,

numerous studies have reported that lifelong caloric restriction (CR) extends mean and maximum lifespan and delays age-associated diseases in a wide variety of species [11, 12]. Many of the beneficial effects of CR are mediated by altering the expression of several HSPs, notably Hsp70, and the activation of heat shock transcription factor 1 [13-15]. In this context, our group has demonstrated that exposure of HepG2 cells to human serum from CR participants conferred significant cytoprotection against heat stress [7]. Moreover, cells treated with human serum from CR volunteers trigger a transcriptional up-regulation of numerous genes and pathways implicated in stress resistance through activation of the transcription factor NF-E2-related factor (NRF2) [16]. NRF2 plays a key role in maintaining homeostasis during oxidative stress and exposure to carcinogens by coordinately regulating the expression of antioxidants and detoxification enzymes [17] that boost protection against cancer [18].

The anti-tumorigenic properties of CR on spontaneously arising tumors and in experimental cancer models are well-documented [19]. For example, 15 days of 40% CR significantly reduces the growth of brain tumors in mice by reducing angiogenesis and increasing tumor cell apoptosis [20]. The combination of fasting and chemotherapy retards the growth of human breast cancer tumors in mice [21] and delays the progression of pancreatic cancer lesions in a mouse model [22]. The use of the mouse as an experimental tool in cancer research is cumbersome, time-consuming and expensive, and, therefore, has compelled us to explore an alternative approach to study anti-cancer therapies.

In this manuscript we present a new approach to investigate a central mechanism by which CR activates a stress response pathway to combat tumorigenesis. The stress response of murine B16F10 melanoma cells maintained in culture medium supplemented with serum from rats fed CR and *ad libitum* (AL) diet was evaluated and compared to that of mice injected with B16F10 melanoma cells and maintained on either CR or AL. In the latter experimental model, mice were subjected to heat stress followed by the monitoring of a melanoma-specific Hsp70 reporter expression. These results combined with microarray analysis illustrated alteration of a common set of cancer-related genes using *in vitro* and *in vivo* testing.

## RESULTS

### Growth rate and heat shock response of B16F10 melanoma cells maintained in serum from CR-fed animals

Proliferation of B16F10 melanoma cells was carried out

in the presence of serum from rats fed either AL or CR diet. A significant reduction in cell growth was observed following incubation with CR serum as compared to AL serum controls (Fig. 1a). Exposure of B16F10 cells to heat stress (45°C) for 1 h caused a significant difference in survival depending on whether these cells were maintained in CR or AL serum (Fig. 1b). Our observations that CR serum decreased heat-dependent cellular cytotoxicity support previously published results from this laboratory [23].

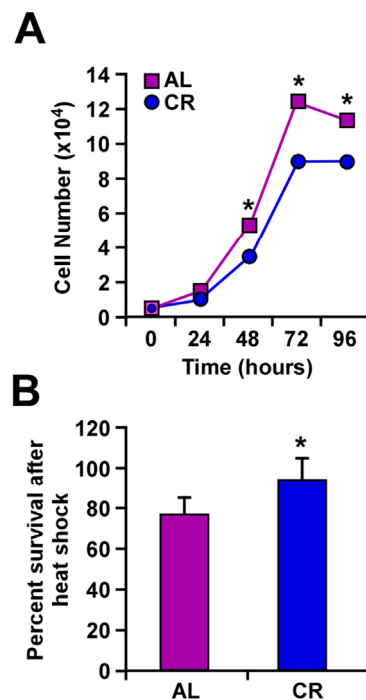

**Figure 1. Caloric restriction slows cellular growth and improves response to heat shock.** (A) B16F10 melanoma cells were maintained in culture with serum from AL- and CR-fed rats over a period of 96 h. The number of cells was counted at 24-h intervals. (B) Percent of cells surviving a 1-h treatment at 45°C when maintained in culture with serum from either AL- or CR-fed rats. Data are represented as the mean  $\pm$  SEM. \*,  $p < 0.05$ .

### Reduction in the number and size of tumors in mice on caloric restriction

To evaluate the effect of CR on tumor growth *in vivo*, mouse B16F10 melanoma cells that were stably transfected with Hsp70-GFP plasmid, were implanted subcutaneously in male C57BL/6 mice fed either a CR or AL diet. A significant decrease in the size and weight of tumors was observed in CR-fed mice along with delayed tumor growth both in the periscapular region and lower back area (Fig. 2).

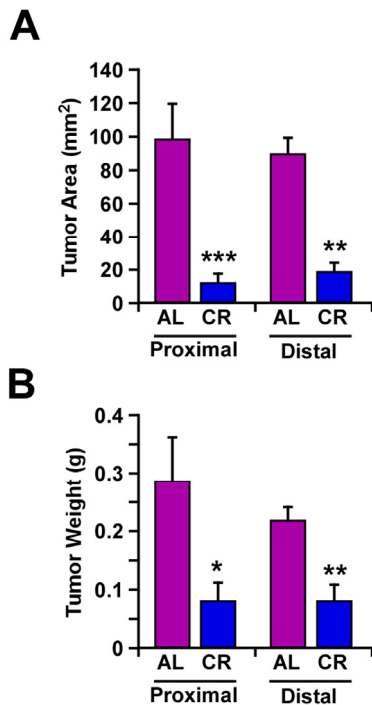

**Figure 2. Caloric restriction decreased melanoma tumor growth *in vivo*.** In AL- and CR-fed mice, mouse tumor xenografts were formed by implanting B16F10 melanoma cells, at the periscapular region (proximal area) and in the lower back over the hip (distal area). Tumor area (mm<sup>2</sup>) (A) and individual tumor weight (g) (B) were determined after 14 days. Data are represented as the mean  $\pm$  SEM. n=10/per group. \*, p<0.05, \*\*, p<0.01, \*\*\* p<0.001.

### Heat stress-mediated induction of Hsp70 expression both in *in vitro* and *in vivo* models

Changes in HSP expression play an important role in the ability of cells to respond to environmental stressors. Earlier work has shown an elevation in Hsp70 expression in B16F10 melanoma cells cultured with serum from CR-fed animals [23]. Here, we compared the effects of CR alone, heat shock alone or the combination ‘CR + heat shock’ using B16F10 melanoma cells stably expressing GFP-tagged Hsp70 construct under the control of rat *hsp70.1* promoter [24]. The results indicate that the heat-mediated induction of Hsp70 expression was significantly higher when B16F10 cells and tumor-bearing animals were subjected to CR (Fig. 3).

### Microarray analysis of B16F10 melanoma cells used in *in vitro* and *in vivo* settings

DNA microarray analysis was performed to compare the global transcriptional effect of CR in B16F10 melanoma cells either grown in culture or implanted in mice. Principal Component Analysis (PCA) revealed inherent *in vivo* and *in vitro* differences that must be taken into account when comparing the impact of CR in gene expression profile. Nevertheless, Venn diagram indicated that both models shared 55 up-regulated and 17 down-regulated transcripts, which were significantly enriched in the CR versus AL pairwise comparisons (Fig. 4a, Supplemental Table 1). Among these shared transcripts, MAP Kinase Interacting Serine/Threonine

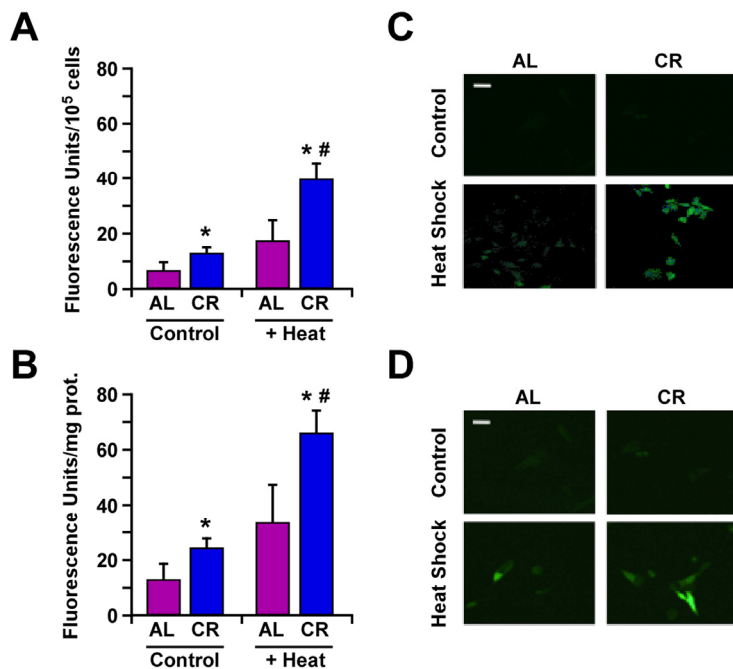

**Figure 3. Caloric restriction improves protection against heat shock through increased expression of Hsp70.** (A) B16F10 melanoma cells stably transfected with a plasmid encoding GFP-tagged Hsp70 construct were maintained in medium supplemented with 10% serum from AL- or CR-fed rats and then subjected or not to heat shock stress for 45 min. Bars represent fluorescence intensity per 10<sup>5</sup> cells. Cell culture experiments were performed as three or more replicates. (B) B16F10 tumor xenografts from mice fed either AL or CR diet were subjected to heat shock stress for 45 min and sacrificed after 4h. Bars represent fluorescence intensity per mg of tumor proteins; n=10 per group. Data, obtained by fluorimetry, are represented as the means  $\pm$  SEM. \*, p<0.05 vs. AL group; #, p<0.05 vs. CR group. (C) Images of B16F10 cells and (D) tumor cells depicting GFP fluorescence were detected by confocal microscopy. White bar, 20  $\mu$ m.

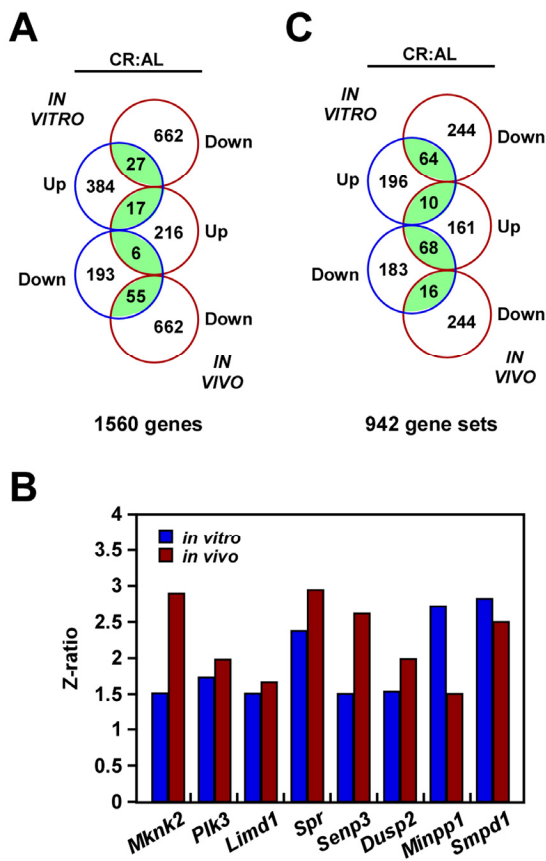

**Figure 4. Gene expression profiling in response to caloric restriction.** (A) Venn diagram showing the overlap of gene transcripts with significant change in expression in the CR versus AL pairwise comparisons by both B16F10 melanoma cells growing in culture (*in vitro*) and as tumor xenografts (*in vivo*). (B) Effect of CR on the expression of a select group of transcripts. (C) Venn diagram showing the overlap of gene sets with significant change in expression in the CR versus AL pairwise comparisons.

Kinase 2 (*Mknk2*) [25], polo-like kinase 3 (*Plk3*) [26] and LIM Domains Containing 1 (*Limd1*) [27] are implicated in tumorigenesis, whereas *Spr* and *Semp3*, which encode for Sepiapterin Reductase and SUMO1/Sentrin/SMT3 Specific Peptidase 3, are involved in stress response [28, 29]. DUSP2 is an important member of the dual-specificity protein phosphatase subfamily, which is implicated in inflammatory response and reported to be upregulated both with CR and heat shock [30]. Moreover, there is an increased expression of *Minpp1*, which encodes for Multiple Inositol Polyphosphate Phosphatase 1. This phosphatase is induced in response to heat shock, osmotic and oxidative stress conditions, thereby contributing to the regulation of ER stress and apoptosis

[31]. Finally, upregulation of *Smpd1* (Sphingomyelin phosphodiesterase 1, also known as ASM) was also observed in both experimental models with CR (Fig. 4b). Its activity is expressed at high levels in cancer cells under the control of an inducible expression of hsp70.1 protein [32]. Using parametric analysis of gene set enrichment, 26 gene sets were identified whose expression levels were significantly altered in the same direction by CR in both experimental models (Fig. 4c, Supplemental Table S2).

## DISCUSSION

The aging process involves multiple physiological mechanisms and represents one of the main risk factors for several human pathologies, such as cancer, diabetes, and cardiovascular disease. Dietary CR retards the aging process and age-related disease pathogenesis [33, 34], and many studies have tried to elucidate the exact mechanism(s) by which CR acts (reviewed in [35]). Our work demonstrates that CR significantly decreases tumor cell proliferation, in agreement with previous studies [36, 37], and this phenomenon takes place whether B16F10 melanoma cells were cultured with serum from CR-fed animals or these tumor cells were implanted in CR-fed mice. Moreover, the process of tumorigenesis was significantly decreased in CR-fed animals after heat stress. Hsp70 is one of several heat-shock proteins implicated in the regulation of cancer cell growth. HSPs sustain tumor survival and drive tumor growth [38]; however, induction of Hsp70 family members results in cellular protection against unfavorable environmental conditions, including elevated temperatures, oxidative stress, exposure to heavy metals, proteasome inhibitors, and infection [39]. CR has been previously shown to restore the ability of cells to mount a heat shock response through increase in Hsp70-mediated thermotolerance [40], an observation that was confirmed in the present study. Moreover, B16F10 melanoma cells subjected to heat shock stress showed greater survival when maintained in CR serum as compared to serum from AL-fed animals. It would appear that heat stress and CR acted cooperatively to enhance cell survival, possibly via activation of the deacetylase SIRT1 [40, 41]. It is interesting to note that the combination of heat stress with CR caused a synergistic increase in Hsp70-GFP expression when compared to either condition alone both *in vitro* and *in vivo*.

Microarray results reinforce the idea that despite significant genome-wide gene expression variation between the two experimental models, the expression profile of several transcripts implicated in tumorigenesis and stress response exhibited a comparable pattern,



whether B16F10 melanoma cells were cultured in CR serum or implanted in mice fed a CR diet. Although this *in vitro* model is quite distant from a physiological setting, it displayed a number of molecular pathways similar to the ones observed *in vivo*.

In conclusion, our findings indicate that the impact of CR on the regulation of several pathways implicated in tumorigenesis on an *in vivo* model of heat stress response can be replicated *in vitro* using tumor cells incubated with serum from CR-fed animals. The idea that hormones and nutrients present in serum, whose levels are altered during CR, are involved in homeostasis control mechanisms, including the aging process, has been suggested [7, 16, 23]. These results support the notion that *in vitro* testing may be well suited for the study of molecular aspects of CR that have not been elucidated yet.

## MATERIALS AND METHODS

**Animals and Dietary Manipulation.** The mice were single-housed in duplex caging in a room maintained at a constant temperature (20-22 °C) and humidity (30-70%) in a light:dark 12:12-h schedule, according to established animal protocols and NIH guidelines. Male C57BL/6 mice (3 month old) were fed on a standard purified mouse diet (NIH-31) *ad libitum* (AL; n=10) or maintained on a 40% calorie restriction regimen (CR; n=10) during six weeks. Body weight and food intake was recorded weekly (supplemental figure 1 a, b).

**Cell culture.** B16F10 melanoma cells (ATCC<sup>®</sup> CRL-6475<sup>™</sup>) were purchased from American Type Culture Collection (Manassas, VA); they were cultured in Dulbecco's Modified Essential Medium (DMEM) supplemented with 10% fetal bovine serum and penicillin/streptomycin (Gibco, Gaithersburg, MD) under standard cell culture conditions. Cells were incubated in media with 10% serum from AL- or CR-fed rats (as described previously [23]). Briefly, serum was obtained from overnight fasted, anesthetized 6-month-old male Fisher 344 rats from three different cohorts. The blood collection took place between 7-11:00 a.m. After a 1-h incubation in a water bath at 45°C, cells were trypsinized, washed twice with phosphate-buffered saline (Invitrogen, Grand Island, NY), and then seeded at  $1.5 \times 10^5$  cells/well in 96-well plates. Cell proliferation assays were carried out during 96 h by the addition of a tetrazolium salt solution, WST-8, to each well according to the manufacturer's protocol (Dojindo, Indianapolis, IN). The absorbance of the formazan dye formed was measured at 450nm using the Perkin Elmer HTS 7000 Plus BioAssay reader.

**Heat shock treatment of B16F10 melanoma xenografts *in vivo*.** One month into the study, mice were injected with  $1 \times 10^6$  B16F10 melanoma cells stably transfected with a plasmid containing *GFP* gene linked to rat stress-inducible *hsp70.1* gene promoter [24] in the periscapular region (proximal) and in the lower back over the hip (distal area). After a two-week period, five mice were randomly chosen from each group and placed in a tumor hyperthermia induction chamber (THIC) constructed in our facility. Mice were anesthetized with isoflurane droplets in a closed chamber prior to being placed in the THIC and maintained under anesthesia for the remainder of the experiment. Two membranous tubes filled with pre-warmed water were placed over the proximal (45°C) and distal (27°C) tumors of the anesthetized mice (supplemental figure 1 c, d). The water temperature was maintained throughout the duration of the experiment. After a 45-min heat treatment, the mice recovered for 4 h and then euthanized by cervical dislocation, according to the AAALAC guidelines.

**Melanoma tumor growth *in vivo*.** Tumor xenografts were formed by implanting murine B16F10 melanoma cells at the periscapular region and in the lower back of AL- and CR-fed mice. Fourteen days later, animals were euthanized and tumors were excised for the determination of the tumor area using a caliper. Tumor weight was also recorded.

**GFP fluorescence detection.** Experiments were carried out as indicated, using B16F10 melanoma cells stably expressing a plasmid encoding GFP-tagged Hsp70 that were either maintained in culture or used as tumor xenografts in mice. GFP fluorescence was monitored using both a confocal microscope (Axiovert-200, Zeiss LSM 510) to obtain images and a fluorimeter (Perkin-Elmer LS-55 and HTS 7000 Plus BioAssay reader) to accurately quantify GFP expression levels, which were normalized per  $10^5$  cells (in culture) or mg of tumor proteins.

**Microarray analysis.** RNA was isolated from B16F10 melanoma cells maintained in culture and as tumor xenografts. For microarray analysis, RNA was processed, reverse transcribed, labeled and hybridized to Mouse 15K cDNA arrays and read on an Illumina BeadArray 500GX reader. Raw data were subjected to Z normalization to ensure compatibility using the formula:  $z(\text{raw data}) = [\ln(\text{raw data}) - \text{avg}(\ln(\text{raw data}))] / [\text{std dev}(\ln(\text{raw data}))]$ , where  $\ln$  is natural logarithm,  $\text{avg}$  is the average over all genes of an array, and  $\text{std dev}$  is the standard deviation over all genes of an array (Cheadle et al., 2003). The Z ratio (between treatment A and B) is given by  $z(A) - z(B) / \text{std dev}$ .

Individual genes with Z ratio > 1.5 in both directions, *P* value < 0.05, and false discovery rate > 0.3 were considered significantly changed. All raw data were deposited in the NCBI Gene Expression Omnibus under accession number GSE67430.

**Statistical analysis.** Statistical analyses were performed using Microsoft Excel software (Microsoft Corp., Redmond, WA). Unpaired t-tests were used for all analyses. Statistical significance was established at *p*<0.05. Data are expressed as means ± standard error of the mean (SEM).

## ACKNOWLEDGEMENTS

We would like to thank Dr. Zdzislaw Krawczyk for giving us the plasmid encoding GFP-tagged Hsp70. This work has been supported by the Intramural Research Program of the National Institute on Aging, National Institutes of Health. MGN was supported by CIBER de Fisiopatología de la Obesidad y Nutrición (CIBERobn), an initiative of ISCIII, Spain.

## Conflict of interest statement

The authors have no conflict of interests to declare.

## REFERENCES

1. Chondrogianni N, Sakellari M, Lefaki M, Papaevgeniou N and Gonos ES. Proteasome Activation Delays Aging in Vitro and in Vivo. *Free Radic Biol Med.* 2014; 71:303-320.
2. López -Otin C, Blasco MA, Partridge L, Serrano M and Kroemer G. The hallmarks of aging. *Cell.* 2013; 153:1194-1217.
3. Jin K. Modern Biological Theories of Aging. *Aging Dis.* 2010; 1:72-74.
4. Wiggins J and Bitzer M. Slowing the aging process. *Clin Geriatr Med.* 2013; 29:721-730.
5. Shore DE, Carr CE and Ruvkun G. Induction of cytoprotective pathways is central to the extension of lifespan conferred by multiple longevity pathways. *PLoS Genet.* 2012; 8:e1002792.
6. Shore DE and Ruvkun G. A cytoprotective perspective on longevity regulation. *Trends Cell Biol.* 2013; 23:409-420.
7. Allard JS, Heilbronn LK, Smith C, Hunt ND, Ingram DK, Ravussin E and de CR. In vitro cellular adaptations of indicators of longevity in response to treatment with serum collected from humans on calorie restricted diets. *PLoS One.* 2008; 3:e3211.
8. Hall DM, Xu L, Drake VJ, Oberley LW, Oberley TD, Moseley PL and Kregel KC. Aging reduces adaptive capacity and stress protein expression in the liver after heat stress. *J Appl Physiol* (1985). 2000; 89:749-759.
9. Rattan SI, Fernandes RA, Demirovic D, Dymek B and Lima CF. Heat stress and hormetin-induced hormesis in human cells: effects on aging, wound healing, angiogenesis, and differentiation. *Dose Response.* 2009; 7:90-103.
10. McCay CM, Crowell MF and Maynard LA. The effect of retarded growth upon the length of life span and upon the ultimate body size. 1935. *Nutrition.* 1989; 5:155-171.
11. McDonald RB and Ramsey JJ. Honoring Clive McCay and 75 years of calorie restriction research. *J Nutr.* 2010; 140:1205-1210.
12. Mercken EM, Carboneau BA, Krzysik-Walker SM and de Cabo R. Of mice and men: the benefits of caloric restriction, exercise, and mimetics. *Ageing Res Rev.* 2012; 11:390-398.
13. Brown MK and Naidoo N. The endoplasmic reticulum stress response in aging and age-related diseases. *FPHYS.* 2012; 3:263.
14. Morimoto RI and Cuervo AM. Proteostasis and the aging proteome in health and disease. *J Gerontol A Biol Sci Med Sci.* 2014; 69 Suppl 1:S33-38.
15. Sinclair DA. Toward a unified theory of caloric restriction and longevity regulation. *Mech Ageing Dev.* 2005; 126:987-1002.
16. Omodei D, Licastro D, Salvatore F, Crosby SD and Fontana L. Serum from humans on long-term calorie restriction enhances stress resistance in cell culture. *Aging (Albany NY).* 2013; 5:599-606.
17. Martin-Montalvo A, Villalba JM, Navas P and de Cabo R. NRF2, cancer and calorie restriction. *Oncogene.* 2011; 30:505-520.
18. Jaramillo MC and Zhang DD. The emerging role of the Nrf2-Keap1 signaling pathway in cancer. *Genes Dev.* 2013; 27:2179-2191.
19. Hursting SD, Smith SM, Lashinger LM, Harvey AE and Perkins SN. Calories and carcinogenesis: lessons learned from 30 years of calorie restriction research. *Carcinogenesis.* 2010; 31:83-89.
20. Mukherjee P, Abate LE and Seyfried TN. Antiangiogenic and proapoptotic effects of dietary restriction on experimental mouse and human brain tumors. *Clin Cancer Res.* 2004; 10:5622-5629.
21. Lee C, Safdie FM, Raffaghello L, Wei M, Madia F, Parrella E, Hwang D, Cohen P, Bianchi G and Longo VD. Reduced levels of IGF-I mediate differential protection of normal and cancer cells in response to fasting and improve chemotherapeutic index. *Cancer Res.* 2010; 70:1564-1572.
22. Lanza-Jacoby S, Yan G, Radice G, LePhong C, Baliff J and Hess R. Calorie restriction delays the progression of lesions to pancreatic cancer in the LSL-KrasG12D; Pdx-1/Cre mouse model of pancreatic cancer. *Exp Biol Med (Maywood).* 2013; 238:787-797.
23. De Cabo R, Fürer-Galban S, Anson RM, Gilman C, Gorospe M and Lane MA. An in vitro model of caloric restriction. *Exp Gerontol.* 2003; 38:631-639.
24. Wysocka A and Krawczyk Z. Green fluorescent protein as a marker for monitoring activity of stress-inducible hsp70 rat gene promoter. *Mol Cell Biochem.* 2000; 215:153-156.
25. Ueda T, Sasaki M, Elia AJ, Chio II, Hamada K, Fukunaga R and Mak TW. Combined deficiency for MAP kinase-interacting kinase 1 and 2 (Mnk1 and Mnk2) delays tumor development. *PNAS.* 2010; 107(32):13984-13990.
26. Strebhardt K. Multifaceted polo-like kinases: drug targets and antitargets for cancer therapy. *Nat Rev Drug Discov.* 2010; 9:643-660.
27. Sharp TV, Munoz F, Bourboulia D, Presneau N, Darai E, Wang HW, Cannon M, Butcher DN, Nicholson AG, Klein G, Imreh S and Boshoff C. LIM domains-containing protein 1 (LIMD1), a tumor suppressor encoded at chromosome 3p21.3, binds pRB and represses E2F-driven transcription. *PNAS.* 2004; 101:16531-16536.
28. Rochette L, Lorin J, Zeller M, Guillaud JC, Lorgis L, Cottin Y and Vergely C. Nitric oxide synthase inhibition and oxidative

stress in cardiovascular diseases: possible therapeutic targets? *Pharmacol Ther.* 2013; 140:239-257.

**29.** Wang Y, Yang J and Yi J. Redox sensing by proteins: oxidative modifications on cysteines and the consequent events. *Antioxid Redox Signal.* 2012; 16:649-657.

**30.** Lang R, Hammer M and Mages J. DUSP meet immunology: dual specificity MAPK phosphatases in control of the inflammatory response. *J Immunol.* 2006; 177:7497-7504.

**31.** Kilaparty SP and Ali N. Changes in expression of Multiple Inositol Polyphosphate Phosphatase1 (Minpp1) under Apoptotic and Cellular Stress Conditions. *FASEB J.* 2013; 27:834.14

**32.** Zhu H, Yoshimoto T and Yamashima T. Heat shock protein 70.1 (Hsp70.1) affects neuronal cell fate by regulating lysosomal acid sphingomyelinase. *J Biol Chem.* 2014; 289:27432-27443.

**33.** Mercken EM, Crosby SD, Lamming DW, JeBailey L, Krzysik-Walker S, Villareal DT, Capri M, Franceschi C, Zhang Y, Becker K, Sabatini DM, de Cabo R and Fontana L. Calorie restriction in humans inhibits the PI3K/AKT pathway and induces a younger transcription profile. *Aging Cell.* 2013; 12:645-651.

**34.** Omodei D and Fontana L. Calorie restriction and prevention of age-associated chronic disease. *FEBS Lett.* 2011; 585:1537-1542.

**35.** De Cabo R, Carmona-Gutierrez D, Bernier M, Hall MN and Madeo F. The search for antiaging interventions: from elixirs to fasting regimens. *Cell.* 2014; 157:1515-1526.

**36.** De Lorenzo MS, Baljinnyam E, Vatner DE, Abarzua P, Vatner SF and Rabson AB. Caloric restriction reduces growth of mammary tumors and metastases. *Carcinogenesis.* 2011; 32:1381-1387.

**37.** Minor RK, López M, Younts CM, Jones B, Pearson KJ, Anson RM, Dieguez C and de Cabo R. The arcuate nucleus and neuropeptide Y contribute to the antitumorigenic effect of calorie restriction. *Aging Cell.* 2011; 10:483-492.

**38.** Daugaard M, Jaattela M and Rohde M. Hsp70-2 is required for tumor cell growth and survival. *Cell Cycle.* 2005; 4:877-880.

**39.** Westerheide SD and Morimoto RI. Heat shock response modulators as therapeutic tools for diseases of protein conformation. *J Biol Chem.* 2005; 280:33097-33100.

**40.** Raynes R, Leckey BD, Jr., Nguyen K and Westerheide SD. Heat shock and caloric restriction have a synergistic effect on the heat shock response in a sir2.1-dependent manner in *Caenorhabditis elegans*. *J Biol Chem.* 2012; 287:29045-29053.

**41.** Westerheide SD, Anckar J, Stevens SM, Jr., Sistonen L and Morimoto RI. Stress-inducible regulation of heat shock factor 1 by the deacetylase SIRT1. *Science.* 2009; 323:1063-1066.
